# Supplementary material
Source: Frontiers journal article supplement (https://www.frontiersin.org/articles/463922)
Supplement: Table_1.docx [file Table_1.docx]

**Supplementary Materials**

***References represented in spatial bibliography***

To map this spatial bibliography, we selected studies that explicitly measure variation in both land use (or land cover) and coral condition. We excluded laboratory experiments that do not measure land use change, and sediment or nutrient budgets that do not measure coral health. We included studies that survey corals at various distances from a shoreline land use, as a proxy for changing land-use pressure. Studies were selected from a “Web of Science” v5.32 (Clarivate Analytics 2019) search of ridge-to-reef keywords, as described in the Introduction.

Abaya, L. M., Wiegner, T. N., Beets, J. P., Colbert, S. L., Carlson, K. M., & Kramer, L. K. (2018). Spatial distribution of sewage pollution on a Hawaiian coral reef. *Marine Pollution Bulletin*, *130*(6), 335–347. https://doi.org/10.1016/j.marpolbul.2018.03.028

Adjeroud, M., & Salvat, B. (1996). Spatial Patterns in Biodiversity of a Fringing Reef Community along Opunohu Bay, Moorea, French Polynesia. Bulletin of Marine Science, 59(1), 175–187.

Adjeroud, M., Poisson, E., Peignon, C., Penin, L., & Kayal, M. (2019). Spatial Patterns and Short-term Changes of Coral Assemblages Along a Cross-shelf Gradient in the Southwestern Lagoon of New Caledonia. Diversity, 11(2), 21. https://doi.org/10.3390/d11020021

Albert, S., Grinham, A., Gibbes, B., Tibbetts, I., & Udy, J. (2014). Indicators of coral reef

ecosystem recovery following reduction in logging and implementation of community- based management schemes in the Solomon Islands. Pacific Conservation Biology, 20(1), 75–85.

Albert, S., Fisher, P. L., Gibbes, B., & Grinham, A. (2015). Corals persisting in naturally turbid

waters adjacent to a pristine catchment in Solomon Islands. Marine Pollution Bulletin,

94(1– 2), 299–306. https://doi.org/10.1016/j.marpolbul.2015.01.031

Amato, D. W., Bishop, J. M., Glenn, C. R., Dulai, H., & Smith, C. M. (2016). Impact of submarine groundwater discharge on marine water quality and reef biota of Maui. *PLoS ONE*, *11*(11), e0165825. https://doi.org/10.1371/journal.pone.0165825

Arias-González, J. E., Fung, T., Seymour, R. M., Garza-Pérez, J. R., Acosta-González, G., Bozec, Y. M., & Johnson, C. R. (2017). A coral-algal phase shift in Mesoamerica not driven by changes in herbivorous fish abundance. PLoS ONE, 12(4), e0174855. https://doi.org/10.1371/journal.pone.0174855

Aronson, R. B., Macintyre, I. G., Lewis, S. A., & Hilbun, N. L. (2005). Emergent zonation and geographic convergence of coral reefs. Ecology, 86(10), 2586-2600.

Aronson, R. B., Hilbun, N. L., Bianchi, T. S., Filley, T. R., & McKee, B. A. (2014). Land use, water quality, and the history of coral assemblages at Bocas del Toro, Panamá. *Marine Ecology Progress Series*, *504*, 159–170. https://doi.org/10.3354/meps10765

Aubrecht, C., Elvidge, C. D., Longcore, T., Rich, C., Safran, J., Strong, A. E., … Erwin, E. H.

(2008). A global inventory of coral reef stressors based on satellite observed nighttime lights. Geocarto International, 23(6), 467–479. https://doi.org/10.1080/10106040802185940

Bahr, K. D., Jokiel, P. L., & Toonen, R. J. (2015). The unnatural history of Kāne‘ohe Bay: coral

reef resilience in the face of centuries of anthropogenic impacts. PeerJ, 3, e950.

https://doi.org/10.7717/peerj.950

Bainbridge, Z., Lewis, S., Bartley, R., Fabricius, K., Collier, C., Waterhouse, J., … Brodie, J. (2018). Fine sediment and particulate organic matter: A review and case study on ridge-to-reef transport, transformations, fates, and impacts on marine ecosystems. *Marine Pollution Bulletin*, *135*, 1205–1220. https://doi.org/10.1016/j.marpolbul.2018.08.002

Barnes, D. J., & Lough, J. M. (1999). Porites growth characteristics in a changed environment: Misima Island, Papua New Guinea. *Coral Reefs*, *18*, 213–218.

Baum, G., Januar, H. I., Ferse, S. C. A., & Kunzmann, A. (2015). Local and regional impacts of pollution on coral reefs along the thousand islands north of the megacity Jakarta, Indonesia. PLoS ONE, 10(9), 1–26. https://doi.org/10.1371/journal.pone.0138271

Becker, G. C., Dalziel, B. D., Kersch-Becker, M. F., Park, M. G., & Mouchka, M. (2013).

Indirect Effects of Human Development Along the Coast on Coral Health. Biotropica, 45(3), 401–407. https://doi.org/10.1111/btp.12019

Bégin, C., Brooks, G., Larson, R. A., Dragicevic, S., Ramos-Scharrón, C. E., & Côté, I. M. (2014). Increased sediment loads over coral reefs in Saint Lucia in relation to land use change in contributing watersheds. *Ocean and Coastal Management*, *95*, 35–45. https://doi.org/10.1016/j.ocecoaman.2014.03.018

﻿Bégin, C., Schelten, C. K., Nugues, M. M., Hawkins, J., Roberts, C., & Côté, I. M. (2016). Effects of Protection and Sediment Stress on Coral Reefs in Saint Lucia. PLoS ONE, 11(2), 1–16. https://doi.org/10.1371/journal.pone.0146855

Birkeland, C. E., Green, A., Fenner, D., Squair, C., & Dahl, A. L. (2013). Substratum stability

and coral reef resilience: Insights from 90 years of disturbances to reefs in American Samoa. Micronesica, 6, 1–16.

Blanco, A., Nadaoka, K., Yamamoto, T., Watanabe, A., Kinjo, K., Motooka, S., … Paringit, C.

R. (2009). A comprehensive assessment of terrestrial loadings and their influence on a fringing reef in Ishigaki Island, Okinawa, Japan. Asian and Pacific Coasts 2009, 228– 235. https://doi.org/10.1142/9789814287951_0167

Bonkosky, M., Hernández-Delgado, E. A., Sandoz, B., Robledo, I. E., Norat-Ramírez, J., & Mattei, H. (2009). Detection of spatial fluctuations of non-point source fecal pollution in coral reef surrounding waters in southwestern Puerto Rico using PCR-based assays. *Marine Pollution Bulletin*, *58*(1), 45–54. https://doi.org/10.1016/j.marpolbul.2008.09.008

Bozec, Y. M., Acosta-González, G., Núñez-Lara, E., & Arias-González, J. E. (2008). Impacts of coastal development on ecosystem structure and function of Yucatan coral reefs , Mexico. Proceedings of the 11th International Coral Reef Symposium, 691–695.

Breckwoldt, A., Dsikowitzky, L., Baum, G., Ferse, S. C. A., van der Wulp, S., Kusumanti, I., … Adrianto, L. (2016). A review of stressors, uses and management perspectives for the larger Jakarta Bay Area, Indonesia. *Marine Pollution Bulletin*, *110*(2), 790–794. https://doi.org/10.1016/j.marpolbul.2016.08.040

Brodie, J. E., Devlin, M., Haynes, D., & Waterhouse, J. (2011). Assessment of the eutrophication status of the Great Barrier Reef lagoon (Australia). Biogeochemistry, 106(2), 281–302. https://doi.org/10.1007/s10533-010-9542-2

Brodie, J. E., Kroon, F. J., Schaffelke, B., Wolanski, E. C., Lewis, S. E., Devlin, M. J., … Davis, A. M. (2012a). Terrestrial pollutant runoff to the Great Barrier Reef: An update of issues, priorities and management responses. *Marine Pollution Bulletin*, *65*(4–9), 81–100. https://doi.org/10.1016/j.marpolbul.2011.12.012

﻿Brodie, J., Wolanski, E., Lewis, S., & Bainbridge, Z. (2012b). An assessment of residence times of land-sourced contaminants in the Great Barrier Reef lagoon and the implications for management and reef recovery. Marine Pollution Bulletin, 65(4–9), 267–279. https://doi.org/10.1016/j.marpolbul.2011.12.011

Brown, B. E., Clarke, K. R., & Warwick, R. M. (2002). Serial patterns of biodiversity change in corals across shallow reef flats in KO Phuket, Thailand, due to the effects of local (sedimentation) and regional (climatic) perturbations. Marine Biology, 141(1), 21–29. https://doi.org/10.1007/s00227-002-0810-0

Brown, C. J., Jupiter, S. D., Albert, S., Klein, C. J., Mangubhai, S., Maina, J. M., … Wenger, A. (2017). Tracing the influence of land-use change on water quality and coral reefs using a Bayesian model. *Nature Scientific Reports*, *7*, 4740. https://doi.org/10.1038/s41598-017-05031-7

Brown, C. J., & Hamilton, R. J. (2018). Estimating the footprint of pollution on coral reefs with models of species turnover. Conservation Biology, 32(4), 949–958. https://doi.org/10.1111/cobi.13079

Browne, N. K. (2012). Spatial and temporal variations in coral growth on an inshore turbid reef subjected to multiple disturbances. *Marine Environmental Research*, *77*, 71–83. https://doi.org/10.1016/j.marenvres.2012.02.005

﻿Browne, N. K., Smithers, S. G., & Perry, C. T. (2010). Geomorphology and community structure of Middle Reef, central Great Barrier Reef, Australia: An inner-shelf turbid zone reef subject to episodic mortality events. Coral Reefs, 29(3), 683–689. https://doi.org/10.1007/s00338-010-0640-3

Browne, N. K., Smithers, S. G., & Perry, C. T. (2012). Coral reefs of the turbid inner-shelf of the Great Barrier Reef, Australia: an environmental and geomorphic perspective on their occurrence, composition and growth. Earth-Science Reviews, 115(1-2), 1-20.

Browne, N. K., Tay, J. K., Low, J., Larson, O., & Todd, P. A. (2015). Fluctuations in coral health of four common inshore reef corals in response to seasonal and anthropogenic changes in water quality. Marine environmental research, 105, 39-52.

﻿Brown, C., Browne, N., McIlwain, J. L., & Zinke, J. (2018). Inshore, turbid coral reefs from northwest Borneo exhibiting low diversity , but high cover show evidence of resilience to various environmental stressors. PeerJ Preprints, (No. e27422v1).

Carilli, J. E., Norris, R. D., Black, B. A., Walsh, S. M., & McField, M. (2009). Local stressors reduce coral resilience to bleaching. PLoS ONE, 4(7), e6324. https://doi.org/10.1371/journal.pone.0006324

Carilli, J. E., Hartmann, A. C., Heron, S. F., Pandolfi, J. M., Cobb, K., Sayani, H., … Sandin, S. A. (2017). Porites coral response to an oceanographic and human impact gradient in the Line Islands. *Limnology and Oceanography*, *62*, 2850–2863. https://doi.org/10.1002/lno.10670

Cleary, D. F. R., Suharsono, & Hoeksema, B. W. (2006). Coral diversity across a disturbance gradient in the Pulau Seribu reef complex off Jakarta, Indonesia. Biodiversity and Conservation, 15(11), 3653–3674. https://doi.org/10.1007/s10531-004-4692-y

Cleary, D. F. R., Polónia, A. R. ., Renema, W., Hoeksema, B. W., Rachello-Dolmen, P. G., Moolenbeek, R. G., … Voogd, N. J. De. (2016). Variation in the composition of corals, fishes, sponges, echinoderms, ascidians, molluscs, foraminifera and macroalgae across a pronounced in-to-offshore environmental gradient in the Jakarta Bay–Thousand Islands coral reef complex. *Marine Pollution Bulletin*, *110*(2), 701–717. https://doi.org/10.1016/j.marpolbul.2016.04.042

Comeros-Raynal, M. T., Lawrence, A., Sudek, M., Vaeoso, M., McGuire, K., Regis, J., & Houk,

P. (2019). Applying a ridge-to-reef framework to support watershed, water quality, and community-based fisheries management in American Samoa. Coral Reefs, 38(3), 505– 520. https://doi.org/10.1007/s00338-019-01806-8

Crabbe, M. J. C., & Smith, D. J. (2005). Sediment impacts on growth rates of Acropora and Porites corals from fringing reefs of Sulawesi, Indonesia. *Coral Reefs*, *24*, 437–441. https://doi.org/10.1007/s00338-005-0004-6

Cramer, K. L., Jackson, J. B. C., Angioletti, C. V., Leonard-Pingel, J., & Guilderson, T. P.

(2012). Anthropogenic mortality on coral reefs in Caribbean Panama predates coral disease and bleaching. Ecology Letters, 15(6), 561–567. https://doi.org/10.1111/j.1461- 0248.2012.01768.x

Cróquer, A., Debrot, D., Klein, E., Kurten, M., Rodríguez, S., & Bastidas, C. (2010). What can two years of monitoring tell us about Venezuelan coral reefs? The Southern Tropical America node of the Global Coral Reef Monitoring Network (STA-GCRMN). Revista de biologia tropical, 58, 51-65.

D’Olivo, J. P., McCulloch, M. T., & Judd, K. (2013). Long-term records of coral calcification across the central Great Barrier Reef : assessing the impacts of river runoff and climate change. *Coral Reefs*, *32*(4), 999–1012. https://doi.org/10.1007/s00338-013-1071-8

Dadhich, A. P., & Nadaoka, K. (2012). Analysis of Terrestrial Discharge from Agricultural Watersheds and Its Impact on Nearshore and Offshore Reefs in Fiji. *Journal of Coastal Research*, *28*(5), 1225–1235. https://doi.org/10.2112/JCOASTRES-D-11-00149.1

Dadhich, A. P., Nadaoka, K., Motomura, Y., & Watanabe, A. (2017). Potential impacts of land use change dynamics and submarine groundwater discharge on fringing reefs of Kuroshima Island, Japan. *Journal of Coastal Conservation*, *21*(1), 245–254. https://doi.org/10.1007/s11852-017-0495-7

De’ath, G., & Fabricius, K. (2010). Water quality as a regional driver of coral biodiversity and macroalgae on the Great Barrier Reef. Ecological Applications, 20(3), 840–850.

DeGeorges, A., Goreau, T. J., & Reilly, B. (2010). Land-sourced pollution with an emphasis on domestic sewage: Lessons from the Caribbean and implications for coastal development on indian ocean and pacific coral reefs. Sustainability, 2(9), 2919–2949. https://doi.org/10.3390/su2092919

Delevaux, J. M. S., Whittier, R., Stamoulis, K. A., Bremer, L. L., Jupiter, S., Friedlander, A. M., … Ticktin, T. (2018a). A linked land-sea modeling framework to inform ridge-to-reef management in high oceanic islands. *PLoS ONE*, *13*(3), 1–37. https://doi.org/10.1371/journal.pone.0193230

Delevaux, J. M. S., Jupiter, S. D., Stamoulis, K. A., Bremer, L. L., Wenger, A. S., Dacks, R., … Ticktin, T. (2018b). Scenario planning with linked land-sea models inform where forest conservation actions will promote coral reef resilience. *Nature: Scientific Reports*, *8*(12465), 1–21. https://doi.org/10.1038/s41598-018-29951-0

Díaz-Ortega, G., & Hernández-Delgado, E. A. (2014). Unsustainable land-based source pollution in a climate of change: A roadblock to the conservation and recovery of elkhorn coral Acropora palmata (Lamarck 1816). *Natural Resources*, *5*(10), 561–581. https://doi.org/10.4236/nr.2014.510050

Dikou, A., & van Woesik, R. (2006). Survival under chronic stress from sediment load: Spatial patterns of hard coral communities in the southern islands of Singapore. Marine Pollution Bulletin, 52(11), 1340–1354. https://doi.org/10.1016/j.marpolbul.2006.02.011

Dodge, R. E., & Vaisnys, J. R. (1977). Coral populations and growth patterns: Responses to sedimentation and turbidity associated with dredging. Journal of Marine Research, 35(4), 715–730.

Dodge, R. E., & Gilbert, T. R. (1984). Chronology of lead pollution contained in banded coral skeletons. *Marine Biology*, *82*, 9–13.

Duprey, N. N., Wang, X. T., Thompson, P. D., Pleadwell, J. E., Raymundo, L. J., Kim, K., … Baker, D. M. (2017). Life and death of a sewage treatment plant recorded in a coral skeleton Δ15N record. *Marine Pollution Bulletin*, *120*(1–2), 109–116. https://doi.org/10.1016/j.marpolbul.2017.04.023

Dutra, L. X. C., Kikuchi, R. K. P., & Leão, Z. M. A. N. (2006). Effects of Sediment Accumulation on Reef Corals from Abrolhos, Bahia, Brazil. *Journal of Coastal Research*, *2*(39), 633–638.

Edinger, E. N., Jompa, J., Limmon, G., Widjatmoko, W., & Risk, M. (1998). Reef Degradation and Coral Biodiversity in Indonesia: Effects of Land-based Pollution, Destructive Fishing Practice and Changes over Time. *Marine Pollution Bulletin*, *36*(8), 617–630. Retrieved from http://www.newclimateeconomy.net/

Edinger, E. N., Limmon, G. V., Jompa, J., Widjatmoko, W., Heikoop, J. M., & Risk, M. J. (2000). Normal coral growth rates on dying reefs: are coral growth rates good indicators of reef health?. Marine Pollution Bulletin, 40(5), 404-425.

Edinger, E. N., & Risk, M. J. (2000). Effect of land-based pollution on central Java coral reefs. Journal of Coastal Development, 3(2), 593-613.

Ennis, R. S., Brandt, M. E., Wilson Grimes, K. R., & Smith, T. B. (2016). Coral reef health response to chronic and acute changes in water quality in St. Thomas, United States Virgin Islands. *Marine Pollution Bulletin*, *111*(1–2), 418–427. https://doi.org/10.1016/j.marpolbul.2016.07.033

Fabricius, K., De’ath, G., McCook, L., & Williams, D. M. (2005). Changes in algal, coral and fish assemblages along water quality gradients on the inshore Great Barrier Reef. *Marine Pollution Bulletin*, *51*(1–4), 384–398. https://doi.org/10.1016/j.marpolbul.2004.10.041

﻿Fabricius, K. E., & McCorry, D. (2006). Changes in octocoral communities and benthic cover along a water quality gradient in the reefs of Hong Kong. Marine Pollution Bulletin, 52(1), 22–33. https://doi.org/10.1016/j.marpolbul.2005.08.004

Fallon, S. J., White, J. C., & McCulloch, M. T. (2002). Porites corals as recorders of mining and environmental impacts : Misima Island , Papua New Guinea. *Geochimica et Cosmochimica Acta*, *66*(1), 45–62.

Figueroa-Zavala, B., Correa-Sandoval, J., Ruiz-Zárate, M. Á., Weissenberger, H., & González-Solís, D. (2015). Environmental and socioeconomic assessment of a poorly known coastal section in the southern Mexican Caribbean. Ocean & Coastal Management, 110, 25-37.

Fisher, W. S., Fore, L. S., Hutchins, A., Quarles, R. L., Campbell, J. G., LoBue, C., & Davis, W. S. (2008). Evaluation of stony coral indicators for coral reef management. *Marine Pollution Bulletin*, *56*(10), 1737–1745. https://doi.org/10.1016/j.marpolbul.2008.07.002

Galvão, T. A., & Nolasco, M. C. (2013). Urbanization and coral reefs in Guarajuba Beach, north coast of Bahia, Brazil. *Ocean and Coastal Management*, *77*, 50–58. https://doi.org/10.1016/j.ocecoaman.2012.03.013

Gawel, Mi. J. (1999). Protection of marine benthic habitats in the Piacific islands. A case study of Guam. Oceanologica Acta, 22(6), 721–726.

Gilby, B. L., Olds, A. D., Connolly, R. M., Stevens, T., Henderson, C. J., Maxwell, P. S., … Schlacher, T. A. (2016). Optimising land-sea management for inshore coral reefs. *PLoS ONE*, *11*(10), e0164934. https://doi.org/10.1371/journal.pone.0164934

Goh, N. K., & Chou, L. M. (1992). A comparison of benthic life-form characteristics of a reef (Cyrene) nearest to and a reef (Raffles Lighthouse) furthest from mainland Singapore. In *Third ASEAN Science and Technology Week Conference Proceedings* (Vol. 6, pp. 55-62.

Golbuu, Y., Victor, S., Wolanski, E., & Richmond, R. H. (2003). Trapping of fine sediment in a semi-enclosed bay, Palau, Micronesia. Estuarine, Coastal and Shelf Science, 57(5–6), 941–949. https://doi.org/10.1016/S0272-7714(02)00424-9

Golbuu, Y., Fabricius, K., Victor, S., & Richmond, R. H. (2008). Gradients in coral reef communities exposed to muddy river discharge in Pohnpei, Micronesia. Estuarine, Coastal and Shelf Science, 76(1), 14–20. https://doi.org/10.1016/j.ecss.2007.06.005

﻿Golbuu, Y., van Woesik, R., Richmond, R. H., Harrison, P., & Fabricius, K. E. (2011a). River discharge reduces reef coral diversity in Palau. Marine Pollution Bulletin, 62(4), 824–831. https://doi.org/10.1016/j.marpolbul.2010.12.015

Goreau, T. J. (2005). Mauritius Marine Management Notes. Global Coral Reef Alliance: Cambridge, MA, USA.

Gouezo, M., Koshiba, S., Otto, E., Olsudong, D., Mereb, G., & Jonathan, R. (2016). Ecological conditions of coral-reef and seagrass marine protected areas in Palau.

Grigg, R. W. (1995). Coral reefs in an urban embayment in Hawaii: a complex case history controlled by natural and anthropogenic stress. *Coral Reefs*, *14*(4), 253–266. https://doi.org/10.1007/BF00334349

Guest, J. R., Tun, K., Low, J., Vergés, A., Marzinelli, E. M., Campbell, A. H., … Steinberg, P. D. (2016). 27 years of benthic and coral community dynamics on turbid , highly urbanised reefs off Singapore. *Nature Scientific Reports*, *6*, 36260. https://doi.org/10.1038/srep36260

Halpern, B. S., Selkoe, K. A., White, C., Albert, S., Aswani, S., & Lauer, M. (2013). Marine protected areas and resilience to sedimentation in the Solomon Islands. *Coral Reefs*, *32*, 61–69. https://doi.org/10.1007/s00338-012-0981-1

Hamilton, R. J., Almany, G. R., Brown, C. J., Pita, J., Peterson, N. A., & Howard Choat, J. (2017). Logging degrades nursery habitat for an iconic coral reef fish. Biological Conservation, 210, 273–280. https://doi.org/10.1016/j.biocon.2017.04.024

Haywood, M. D. E., Dennis, D., Thomson, D. P., & Pillans, R. D. (2016). Mine waste disposal leads to lower coral cover, reduced species richness and a predominance of simple coral growth forms on a fringing coral reef in Papua New Guinea. *Marine Environmental Research*, *115*, 36–48. https://doi.org/10.1016/j.marenvres.2016.02.003

Heery, E. C., Hoeksema, B. W., Browne, N. K., Reimer, J. D., Ang, P. O., Huang, D., … Todd, P. A. (2018). Urban coral reefs: Degradation and resilience of hard coral assemblages in coastal cities of East and Southeast Asia. *Marine Pollution Bulletin*, *135*, 654–681. https://doi.org/10.1016/j.marpolbul.2018.07.041

Herrán, N., Narayan, G. R., Reymond, C. E., & Westphal, H. (2017). Calcium Carbonate Production, Coral Cover and Diversity along a Distance Gradient from Stone Town: A Case Study from Zanzibar, Tanzania. Frontiers in Marine Science, 4, 412. https://doi.org/10.3389/fmars.2017.00412

Hodgson, G., & Dixon, J. A. (1988). Logging versus Fisheries and Tourism in Palawan. Occasional Papers of the East-West Environment and Policy Institute, 7, 1–89.

Hoffmann, T. C. (2002). Coral reef health and effects of socio-economic factors in Fiji and Cook Islands. Marine pollution bulletin, 44(11), 1281-1293.

Huang, H., Li, X. B., Titlyanov, E. A., Ye, C., Titlyanova, T. V., Guo, Y. P., & Zhang, J. (2013). Linking macroalgal δ15N-values to nitrogen sources and effects of nutrient stress on coral condition in an upwelling region. Botanica Marina, 56(5–6), 471–480. https://doi.org/10.1515/bot-2012-0223

Hunter, C. L., & Evans, C. W. (1995). Coral Reefs in Kaneohe Bay, Hawaii: Two Centuries of Western Influence and Two Decades of Data. *Bulletin of Marine Science*, *57*(2), 501–515.

Isdale, P. P. (1983, January). Geographical patterns in coral growth rates on the Great Barrier Reef. In Proceedings: Inaugural Great Barrier Reef Conference, Townsville Aug 28-Sept 2, 1983-pages: 327-330. James Cook University Press.

Klein, C. J., Jupiter, S. D., Selig, E. R., Watts, M. E., Halpern, B. S., Kamal, M., … Possingham, H. P. (2012). Forest conservation delivers highly variable coral reef conservation outcomes. *Ecological Applications*, *22*(4), 1246–1256. https://doi.org/10.1890/11-1718.1

Klein, C. J., Jupiter, S. D., Watts, M., & Possingham, H. P. (2014). Evaluating the influence of candidate terrestrial protected areas on coral reef condition in Fiji. *Marine Policy*, *44*, 360–365. https://doi.org/10.1016/j.marpol.2013.10.001

Koshiba, S., Besebes, M., Soaladaob, K., Isechal, A. L., Victor, S., & Golbuu, Y. (2013). Palau’s taro fields and mangroves protect the coral reefs by trapping eroded fine sediment. Wetlands Ecology and Management, 21(3), 157–164. https://doi.org/10.1007/s11273-013-9288-4

Lai, S., Loke, L. H. L., Hilton, M. J., Bouma, T. J., & Todd, P. A. (2015). The effects of urbanisation on coastal habitats and the potential for ecological engineering: A Singapore case study. *Ocean and Coastal Management*, *103*, 78–85. https://doi.org/10.1016/j.ocecoaman.2014.11.006

﻿Lamb, J. B., Wenger, A. S., Devlin, M. J., Ceccarelli, D. M., Williamson, D. H., & Willis, B. L. (2016). Reserves as tools for alleviating impacts of marine disease. *Philosophical Transactions of the Royal Society B: Biological Sciences*, *371*(1689). https://doi.org/10.1098/rstb.2015.0210

Lane, D. J. W., & Lim, G. P. C. (2013). Reef corals in a high sedimentation environment on the ‘Mainland’ coast of Brunei, Northwest Borneo. Galaxea, Journal of Coral Reef Studies, 15(Supplement), 166–171. https://doi.org/10.3755/galaxea.15.166

Lapointe, B. E., & Clark, M. W. (1992). Nutrient Inputs from the Watershed and Coastal Eutrophication in the Florida Keys. Estuaries, 15(4), 465–475. https://doi.org/10.2307/1352391

Lapointe, B. E. (2003). Impacts on Land-based Nutrient Pollution on Coral Reefs of Tobago. Harbor Branch Oceanographic Institution.

Lapointe, B. E., Langton, R., Bedford, B. J., Potts, A. C., Day, O., & Hu, C. (2010). Land-based nutrient enrichment of the Buccoo Reef Complex and fringing coral reefs of Tobago, West Indies. *Marine Pollution Bulletin*, *60*(3), 334–343. https://doi.org/10.1016/j.marpolbul.2009.10.020

Leão, Z. M. A. N., & Kikuchi, R. K. P. (2005). A relic coral fauna threatened by global changes and human activities, Eastern Brazil. Marine Pollution Bulletin, 51(5–7), 599–611. https://doi.org/10.1016/j.marpolbul.2005.04.024

Lirman, D., & Fong, P. (2007). Is proximity to land-based sources of coral stressors an appropriate measure of risk to coral reefs? An example from the Florida Reef Tract. Marine Pollution Bulletin, 54(6), 779–791. https://doi.org/10.1016/j.marpolbul.2006.12.014

Loiola, M., Cruz, I. C. S., Lisboa, D. S., Mariano-Neto, E., Leão, Z. M. A. N., Oliveira, M. D. M., & Kikuchi, R. K. P. (2019). Structure of marginal coral reef assemblages under different turbidity regime. Marine Environmental Research, 147, 138–148. https://doi.org/10.1016/j.marenvres.2019.03.013

Lough, J. M., & Barnes, D. J. (1992). Comparisons of skeletal density variations in Porites from

the central Great Barrier Reef. Journal of Experimental Marine Biology and Ecology, 155(1), 1-25.

Lotze, H. K., Lenihan, H. S., Bourque, B. J., Bradbury, R. H., Cooke, R. G., Kay, M. C., … Bay, M. (2006). Depletion, degradation, and recovery potential of estuaries and coastal seas. *Science*, *312*(5781), 1806–1809. https://doi.org/10.1126/science.1128035

Lough, J. M., & Barnes, D. J. (1992). Comparisons of skeletal density variations in Porites from the central Great Barrier Reef. Journal of Experimental Marine Biology and Ecology, 155(1), 1-25.

﻿ Macharia, D., Grimsditch, G., Abdulla, A., & Obura, D. (2016). Mapping factors that contribute to coral reef resilience using in situ and satellite data in East Africa. In Estuaries: A Lifeline of Ecosystem Services in the Western Indian Ocean (pp. 259-276). Springer, Cham.

MacNeil, M. A., Mellin, C., Matthews, S., Wolff, N. H., McClanahan, T. R., Devlin, M., … Graham, N. A. (2019). Water quality mediated resilience on the Great Barrier Reef. Nature Ecology & Evolution2l, 3, 620–627. https://doi.org/10.1038/s41559-019-0832-3

Mageswaran, T., Sachithanandam, V., Sridhar, R., Thirunavukarasu, E., & Ramesh, R. (2015). Mapping and monitoring of land use/land cover changes in Neil Island (South Andaman) using geospatial approaches.

Maina, J., de Moel, H., Vermaat, J. E., Bruggemann, J. H., Guillaume, M. M. M., Grove, C. A., … Zinke, J. (2012). Linking coral river runoff proxies with climate variability, hydrology and land-use in Madagascar catchments. *Marine Pollution Bulletin*, *64*, 2047–2059. https://doi.org/10.1016/j.marpolbul.2012.06.027

Maina, J., De Moel, H., Zinke, J., Madin, J., McClanahan, T., & Vermaat, J. E. (2013). Human deforestation outweighs future climate change impacts of sedimentation on coral reefs. *Nature Communications*, *4*, 1986. https://doi.org/10.1038/ncomms2986

Mallela, J., Perry, C. T., & Haley, M. P. (2004). Reef morphology and community structure along a fluvial gradient, Rio Bueno, Jamaica. Caribbean Journal of Science, 40(3), 299–311.

Maragos, J. E. (1993). Impact of coastal construction on coral reefs in the U.S.‐affiliated pacific Islands. *Coastal Management*, *21*(4), 235–269.

Martínez-Rendis, A., González, G. A., Hernández-Stefanoni, J. L., & González, J. E. A. (2016). Quantifying the reefscape transformation of a coastal Caribbean coral reef during a phase shift and the associated coastal landscape change. Marine Ecology, 37(3), 697–710. https://doi.org/10.1111/maec.12334

Martins, C. D. L., Arantes, N., Faveri, C., Batista, M. B., Oliveira, E. C., Pagliosa, P. R., … Horta, P. A. (2012). The impact of coastal urbanization on the structure of phytobenthic communities in southern Brazil. *Marine Pollution Bulletin*, *64*(4), 772–778. https://doi.org/10.1016/j.marpolbul.2012.01.031

McClanahan, T. R., & Obura, D. (1997). Sedimentation effects on shallow coral communities Kenya. *Journal of Experimental Marine Biology and Ecology*, *209*, 103–122.

Melbourne-Thomas, J., Johnson, C. R., & Fulton, E. A. (2011). Regional-scale scenario analysis for the Meso-American Reef system: Modelling coral reef futures under multiple stressors. Ecological modelling, 222(10), 1756-1770.

Mioche, D., & Cuet, P. (1999). Carbon, carbonate and nutrient fluxes in summer on a fringing reef subject to anthropogenic pressure (Reunion Island, Indian Ocean). Comptes Rendus de l'Academie des Sciences Series IIA Earth and Planetary Science, 1(329), 53-59.

Miller, R. L., & Cruise, J. F. (1995). Effects of suspended sediments on coral growth: Evidence from remote sensing and hydrologic modeling. Remote Sensing of Environment, 53(3), 177–187. https://doi.org/10.1016/0034-4257(95)00081-B

Mora, C. (2008). A clear human footprint in the coral reefs of the Caribbean. *Proceedings of the Royal Society B: Biological Sciences*, *275*(1636), 767–773. https://doi.org/10.1098/rspb.2007.1472

Morgan, K. M., Perry, C. T., Smithers, S. G., Johnson, J. A., & Daniell, J. J. (2016). Evidence of extensive reef development and high coral cover in nearshore environments: Implications for understanding coral adaptation in turbid settings. *Scientific Reports*, *6*(March), 1–10. https://doi.org/10.1038/srep29616

﻿Morgan, K. M., Perry, C. T., Johnson, J. A., & Smithers, S. G. (2017). Nearshore Turbid-Zone Corals Exhibit High Bleaching Tolerance on the Great Barrier Reef Following the 2016 Ocean Warming Event. Frontiers in Marine Science, 4(July), 1–13. https://doi.org/10.3389/fmars.2017.00224

Moustaka, M., Mohring, M. B., Holmes, T., Evans, R. D., Thomson, D., Nutt, C., … Wilson, S. K. (2019). Cross-shelf heterogeneity of coral assemblages in Northwest Australia. Diversity, 11(2), 1–19. https://doi.org/10.3390/d11020015

Nava, H., & Ramírez-Herrera, M. T. (2012). Land use changes and impact on coral communities along the central Pacific coast of Mexico. *Environmental Earth Sciences*, *65*(4), 1095–1104. https://doi.org/10.1007/s12665-011-1359-3

Nemeth, R. S., & Nowlis, J. S. (2001). Monitoring the effects of land development on the near-shore reef environment of St. Thomas, USVI. *Bulletin of Marine Science*, *69*(2), 759–775.

Ng, C. S. L., Toh, T. C., & Chou, L. M. (2016). Coral restoration in Singapore’s sediment

challenged sea. Regional Studies in Marine Science, 8, 422–429. https://doi.org/10.1016/j.rsma.2016.05.005

Norat-Ramírez, J., Méndez-Lázaro, P., Hernández-Delgado, E. A., Mattei-Torres, H., & Cordero-Rivera, L. (2019). A septic waste index model to measure the impact of septic tanks on coastal water quality and coral reef communities in Rincon, Puerto Rico. *Ocean and Coastal Management*, *169*(1), 201–213. https://doi.org/10.1016/j.ocecoaman.2018.12.016

Öhman, M. C., Rajasuriya, A., & Lindén, O. (1993). Human disturbances on coral reefs in Sri Lanka: a case study. Ambio, 22(7), 474-480.

﻿Olds, A. D., Pitt, K. A., Maxwell, P. S., Babcock, R. C., Rissik, D., & Connolly, R. M. (2014). Marine reserves help coastal ecosystems cope with extreme weather. Global Change Biology, 20(10), 3050–3058. https://doi.org/10.1111/gcb.12606

Oleson, K. L. L., Falinski, K. A., Lecky, J., Rowe, C., Kappel, C. V., Selkoe, K. A., & White, C. (2017). Upstream solutions to coral reef conservation: The payoffs of smart and cooperative decision-making. *Journal of Environmental Management*, *191*, 8–18. https://doi.org/10.1016/j.jenvman.2016.12.067

Oliver, L. M., Lehrter, J. C., & Fisher, W. S. (2011). Relating landscape development intensity to coral reef condition in the watersheds of St. Croix, US Virgin Islands. *Marine Ecology Progress Series*, *427*, 293–302. https://doi.org/10.3354/meps09087

Oliver, L. M., Fisher, W. S., Fore, L., Smith, A., & Bradley, P. (2018). Assessing land use, sedimentation, and water quality stressors as predictors of coral reef condition in St. Thomas, U.S. Virgin Islands. *Environmental Monitoring and Assessment*, *190*(4), 1–16. https://doi.org/10.1007/s10661-018-6562-1

Pari, N., Peyrot-Clausade, M., & Hutchings, P. A. (2002). Bioerosion of experimental substrates on high islands and atoll lagoons (French Polynesia) during 5 years of exposure. *Journal of Experimental Marine Biology and Ecology*, *276*(1–2), 109–127.

Perry, C. T., Smithers, S. G., Gulliver, P., & Browne, N. K. (2012). Evidence of very rapid reef

accretion and reef growth under high turbidity and terrigenous sedimentation. Geology, 40(8), 719–722. https://doi.org/10.1130/G33261.1

Pollock, F. J., Lamb, J. B., Field, S. N., Heron, S. F., Schaffelke, B., Shedrawi, G., … Willis, B.

L. (2014). Sediment and Turbidity Associated with Offshore Dredging Increase Coral Disease Prevalence on Nearby Reefs. PLoS ONE, 11(11), e102498. https://doi.org/10.1371/journal.pone.0102498

Prouty, N. G., Field, M. E., Stock, J. D., Jupiter, S. D., & McCulloch, M. (2010). Coral Ba/Ca

records of sediment input to the fringing reef of the southshore of Moloka’i, Hawai’i over

the last several decades. *Marine Pollution Bulletin*, *60*(10), 1822–1835. https://doi.org/10.1016/j.marpolbul.2010.05.024

Prouty, N. G., Storlazzi, C. D., McCutcheon, A. L., & Jenson, J. W. (2014). Historic impact of

watershed change and sedimentation to reefs along west-central Guam. Coral Reefs, 33(3), 733–749. https://doi.org/10.1007/s00338-014-1166-x

Ramos-Scharrón, C. E., Torres-Pulliza, D., & Hernández-Delgado, E. A. (2015). Watershed- and island wide-scale land cover changes in Puerto Rico (1930s-2004) and their potential effects on coral reef ecosystems. *Science of the Total Environment*, *506*–*507*, 241–251. https://doi.org/10.1016/j.scitotenv.2014.11.016

Rees, J. G., Setiapermana, D., Sharp, V. A., Weeks, J. M., & Williams, T. M. (1999). Evaluation

of the impacts of land-based contaminants on the benthic faunas of Jakarta Bay, Indonesia. Oceanologica Acta, 22(6), 627–640.

Reopanichkul, P., Schlacher, T. A., Carter, R. W., & Worachananant, S. (2009). Sewage impacts

coral reefs at multiple levels of ecological organization. *Marine Pollution Bulletin*, *58*(9), 1356–1362. https://doi.org/10.1016/j.marpolbul.2009.04.024

Restrepo, J. D. (2008). Applicability of LOICZ catchment–coast continuum in a major Caribbean basin: the Magdalena River, Colombia. Estuarine, Coastal and Shelf Science, 77(2), 214-229.

Richmond, R. H., Golbuu, Y., & Shelton III, A. J. (2019). Successful Management of Coral Reef-Watershed Networks. Coasts and Estuaries. Elsevier Inc. https://doi.org/10.1016/B978-0-12-814003-1.00026-5

Rajasuriya, A., & White, A. T. (1995). Coral reefs of Sri Lanka: Review of their extent, condition, and management status. Coastal Management, 23(1), 77-90.

﻿Redding, J. E., Myers-Miller, R. L., Baker, D. M., Fogel, M., Raymundo, L. J., & Kim, K. (2013). Link between sewage-derived nitrogen pollution and coral disease severity in Guam. Marine Pollution Bulletin, 73(1), 57–63. https://doi.org/10.1016/j.marpolbul.2013.06.002

Roberts, M., Hanley, N., Williams, S., & Cresswell, W. (2017). Terrestrial degradation impacts on coral reef health: Evidence from the Caribbean. *Ocean and Coastal Management*, *149*, 52–68. https://doi.org/10.1016/j.ocecoaman.2017.09.005

﻿Rodgers, K. S., Kido, M. H., Jokiel, P. L., Edmonds, T., & Brown, E. K. (2012). Use of Integrated Landscape Indicators to Evaluate the Health of Linked Watersheds and Coral Reef Environments in the Hawaiian Islands. Environmental Management, 50(1), 21–30. https://doi.org/10.1007/s00267-012-9867-9

Rongo, T. (2004). Coral community change along a sediment gradient in Fouha Bay, Guam (Doctoral dissertation, University of Guam).

Rothenberger, P., Blondeau, J., Cox, C., Curtis, S., Fisher, W. S., Garrison, V., … Waddell, J. (2008). *The State of Coral Reef Ecosystems of the U.S. Virgin Islands*. St. Croix, USVI.

Rotmann, S., & Thomas, S. (2012). Coral Tissue Thickness as a Bioindicator of Mine-Related Turbidity Stress on Coral Reefs at Lihir Island, Papua New Guinea. *Oceanography*, *24*(4), 52–63.

﻿Rude, J., Minks, A., Doheny, B., Tyner, M., Maher, K., Huffard, C., … Grantham, H. (2016). Ridge to reef modelling for use within land – sea planning under data-limited conditions. Aquatic Conservation: Marine and Freshwater Ecosystems, 26(2), 251–264. https://doi.org/10.1002/aqc.2548

Ryan, K. E., Walsh, J. P., Corbett, D. R., & Winter, A. (2008). A record of recent change in terrestrial sedimentation in a coral-reef environment, La Parguera, Puerto Rico: A response to coastal development? Marine Pollution Bulletin, 56(6), 1177–1183. https://doi.org/10.1016/j.marpolbul.2008.02.017

Saunders, M. I., Bode, M., Atkinson, S., Klein, C. J., Metaxas, A., Beher, J., … Possingham, H. P. (2017). Simple rules can guide whether land- or ocean-based conservation will best benefit marine ecosystems. *PLoS Biology*, *15*(9), 1–22. https://doi.org/10.1371/journal.pbio.2001886

Sawall, Y., Jompa, J., Litaay, M., Maddusila, A., & Richter, C. (2013). Coral recruitment and potential recovery of eutrophied and blast fishing impacted reefs in Spermonde Archipelago, Indonesia. Marine Pollution Bulletin, 74(1), 374-382.

Scott, P. J. B. (1990). Chronic pollution recorded in coral skeletons in Hong Kong. *Journal of Experimental Marine Biology and Ecology*, *139*, 51–64.

Shapiro, A. C., & Rohmann, S. O. (2005). Summit-to-sea mapping and change detection using satellite imagery: tools for conservation and management of coral reefs. Revista de biología tropical, 53, 185-193.

Smith, S. V., Kimmerer, W. J., Laws, E. A., Brock, R. E., & Walsh, T. W. (1981). Kaneohe Bay Sewage Diversion Experiment: Perspectives on Ecosystem Responses to Nutritional Perturbation. Pacific Science, 35(4), 279–395.

Smith, T. B., Nemeth, R. S., Blondeau, J., Calnan, J. M., Kadison, E., & Herzlieb, S. (2008).

Assessing coral reef health across onshore to offshore stress gradients in the US Virgin Islands. *Marine Pollution Bulletin*, *56*(12), 1983–1991. https://doi.org/10.1016/j.marpolbul.2008.08.015

Star, M., Rolfe, J., McCosker, K., Smith, R., Ellis, R., Waters, D., & Waterhouse, J. (2018). Targeting for pollutant reductions in the Great Barrier Reef river catchments. *Environmental Science and Policy*, *89*, 365–377. https://doi.org/10.1016/j.envsci.2018.09.005

Stender, Y., Jokiel, P. L., & Rodgers, K. S. (2014). Thirty years of coral reef change in relation

to coastal construction and increased sedimentation at Pelekane Bay, Hawaiʻi. PeerJ, 2, e300. https://doi.org/10.7717/peerj.300

Stimson, J. (2018). Recovery of coral cover in records spanning 44 yr for reefs in Kāne‘ohe Bay,

Oa‘hu, Hawai‘i. Coral Reefs, 37(1), 55–69. https://doi.org/10.1007/s00338-017-1633-2

Stubler, A. D., Stevens, A. K., & Peterson, B. J. (2016). Using community-wide recruitment and succession patterns to assess sediment stress on Jamaican coral reefs. Journal of Experimental Marine Biology and Ecology, 474, 29–38. https://doi.org/10.1016/j.jembe.2015.09.018

Suchley, A., & Alvarez-Filip, L. (2018). Local human activities limit marine protection efficacy on Caribbean coral reefs. Conservation Letters, 11(5), 1–9. https://doi.org/10.1111/conl.12571

Tarya, A., Hoitink, A. J. F., Vegt, M. Van der, van Katwijk, M. M., Hoeksema, B. W., Bouma,

T. J., … Christianen, M. J. A. (2018). Exposure of coastal ecosystems to river plume spreading across a near-equatorial continental shelf. Continental Shelf Research, 153, 1– 15. https://doi.org/10.1016/j.csr.2017.12.003

Teichberg, M., Wild, C., Bednarz, V. N., Kegler, H. F., Lukman, M., Gärdes, A. A., … Plass-Johnson, J. G. (2018). Spatio-Temporal Patterns in Coral Reef Communities of the Spermonde Archipelago, 2012–2014, I: Comprehensive Reef Monitoring of Water and Benthic Indicators Reflect Changes in Reef Health. Frontiers in Marine Science, 5(33). https://doi.org/10.3389/fmars.2018.00033

Thomassin, B. A., Gourbesville, P., Gout, B., & Arnoux, A. (1998). Impact of an industrial and urban sewage off a coral fringing reef at Mauritius (Indian ocean): modeling of plumes, distribution of trace metals in sediments and effects of the eutrophisation on coral reef communities. In *IEEE Oceanic Engineering Society. OCEANS (Cat. No.98)* (p. CH36259).

Thompson, A., Schroeder, T., Brando, V. E., & Schaffelke, B. (2014). Coral community responses to declining water quality: Whitsunday Islands, Great Barrier Reef, Australia. *Coral Reefs*, *33*(4), 923–938. https://doi.org/10.1007/s00338-014-1201-y

Todd, P. A., Sanderson, P. G., & Chou, L. M. (2001). Morphological variation in the polyps of the scleractinian coral *Favia speciosa* around Singapore. *Hydrobiologia*, *444*, 227–235.

Todd, P. A., Ong, X., & Chou, L. M. (2010). Impacts of pollution on marine life in Southeast Asia. *Biodiversity Conservation*, *19*(4), 1063–1082. https://doi.org/10.1007/s10531-010-9778-0

Torres, J. L. (2001). Impacts of sedimentation on the growth rates of Montastraea annularis in southwest Puerto Rico. *Bulletin of Marine Science*, *69*(2), 631–637.

Tribble, G., Stock, J., & Jacobi, J. (2015). Watershed Processes from Ridge to Reef: Consequences of Feral Ungulates for Coral Reef and Effects of Watershed Management. In *Headwaters to estuaries: advances in watershed science and management—Proceedings of the Fifth Interagency Conference on Research in the Watersheds* (p. 194).

Tulloch, V. J. D., Brown, C. J., Possingham, H. P., Jupiter, S. D., Maina, J. M., & Klein, C. (2016). Improving conservation outcomes for coral reefs affected by future oil palm development in Papua New Guinea. *Biological Conservation*, *203*, 43–54. https://doi.org/10.1016/j.biocon.2016.08.013

Van Woesik, R., Tomascik, T., & Blake, S. (1999). Coral assemblages and physico-chemical characteristics of the Whitsunday Islands: Evidence of recent community changes. Marine and Freshwater Research, 50(5), 427–440. https://doi.org/10.1071/MF97046

Vanderstraete, T., Goossens, R., & Ghabour, T. K. (2006). The use of multi-temporal Landsat images for the change detection of the coastal zone near Hurghada, Egypt. *International Journal of Remote Sensing*, *27*(17), 3645–3655. https://doi.org/10.1080/01431160500500342

Welle, P. D., Small, M. J., Doney, S. C., & Azevedo, I. L. (2017). Estimating the effect of multiple environmental stressors on coral bleaching and mortality. PLoS ONE, 12(5), 1–15. https://doi.org/10.1371/journal.pone.0175018

Wenger, A. S., Williamson, D. H., da Silva, E. T., Ceccarelli, D. M., Browne, N. K., Petus, C., &

Devlin, M. J. (2016). Effects of reduced water quality on coral reefs in and out of no-take marine reserves. Conservation Biology, 30(1), 142–153. https://doi.org/10.1111/cobi.12576

West, K., & van Woesik, R. (2001). Spatial and temporal variance of river discharge on Okinawa (Japan): Inferring the temporal impact on adjacent coral reefs. *Marine Pollution Bulletin*, *42*(10), 864–872. https://doi.org/10.1016/S0025-326X(01)00040-6

Wolanski, E., Richmond, R. H., & McCook, L. (2004). A model of the effects of land-based, human activities on the health of coral reefs in the Great Barrier Reef and in Fouha Bay, Guam , Micronesia. *Journal of Marine Systems*, *46*, 133–144. https://doi.org/10.1016/j.jmarsys.2003.11.018

Wolanski, E., & De’ath, G. (2005). Predicting the impact of present and future human land-use on the Great Barrier Reef. *Estuarine, Coastal and Shelf Science*, *64*(2–3), 504–508. https://doi.org/10.1016/j.ecss.2005.03.017

Wolanski, E., Martinez, J. A., & Richmond, R. H. (2009). Quantifying the impact of watershed urbanization on a coral reef: Maunalua Bay, Hawaii. *Estuarine, Coastal and Shelf Science*, *84*(2), 259–268. https://doi.org/10.1016/j.ecss.2009.06.029

Wong, K. T., Chui, A. P. Y., Lam, E. K. Y., & Ang, P. (2018). A 30-year monitoring of changes in coral community structure following anthropogenic disturbances in Tolo Harbour and Channel, Hong Kong. *Marine Pollution Bulletin*, *133*, 900–910. https://doi.org/10.1016/j.marpolbul.2018.06.049

Wooldridge, S. A., & Done, T. J. (2009). Improved water quality can ameliorate effects of climate change on corals. *Ecological Applications*, *19*(6), 1492–1499.

Yamano, H., Satake, K., Inoue, T., Kadoya, T., Hayashi, S., Kinjo, K., … Hibiki, A. (2015). An integrated approach to tropical and subtropical island conservation. Journal of Ecology and Environment, 38(2), 271–279. https://doi.org/10.5141/ecoenv.2015.028

Yamano, H., & Watanabe, T. (2016). Coupling remote sensing and coral annual band data to investigate the history of catchment land use and coral reef status. In Coral Reef Science (pp. 47-53). Springer, Tokyo.

Yang, D. T., Liu, S. M., & Shan, X. J. (2013). Detection of coral distribution change in recent decades with satellite remote sensing. Proceedings of the 2013 6th International Congress on Image and Signal Processing, CISP 2013, 2, 830–834. https://doi.org/10.1109/CISP.2013.6745280

Yates, K. K., Rogers, C. S., Herlan, J. J., Brooks, G. R., Smiley, N. A., & Larson, R. A. (2014). Diverse coral communities in mangrove habitats suggest a novel refuge from climate change. Biogeosciences. https://doi.org/10.5194/bg-11-4321-2014

Yoshioka, R. M., Kim, C. J. S., Tracy, A. M., Most, R., & Harvell, C. D. (2016). Linking sewage pollution and water quality to spatial patterns of Porites lobata growth anomalies in Puako, Hawaii. *Marine Pollution Bulletin*, *104*(1–2), 313–321. https://doi.org/10.1016/j.marpolbul.2016.01.002
